# Supplementary material for: Exercise training reduces resting heart rate via downregulation of the funny channel HCN4
Source: PubMed Central journal article supplement (PMC4024745; doi:10.1038/ncomms4775), 2014-05-13
Supplement: ncomms4775-s1.pdf [file ncomms4775-s1.pdf]

## SUPPLEMENTARY INFORMATION

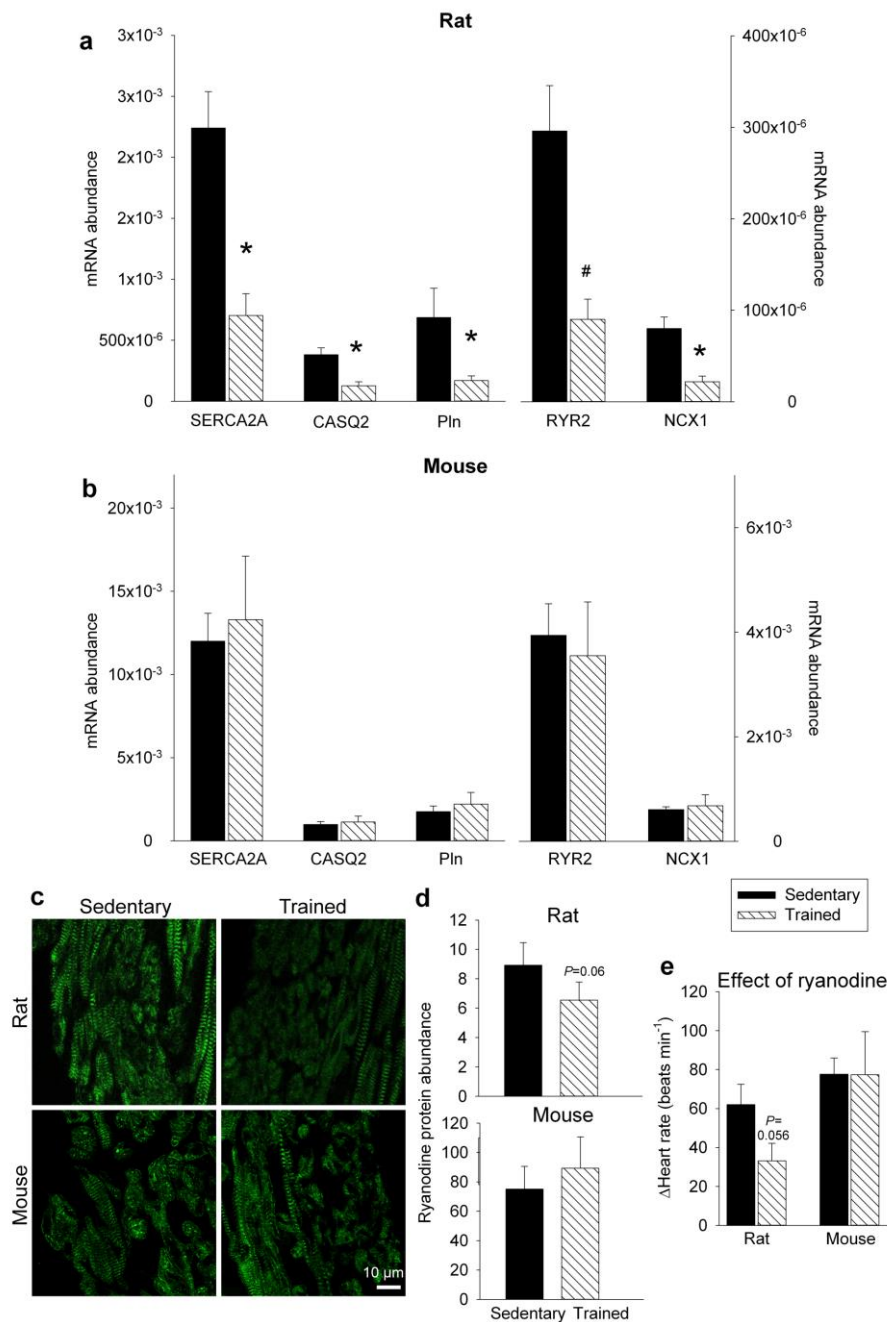

**Supplementary Figure 1. Is the Ca<sup>2+</sup> clock altered by training?** **a** and **b**, Mean (+SEM) mRNA expression of key proteins comprising the Ca<sup>2+</sup> clock in the rat (**a**; n=5/8) and mouse (**b**; n=6/7). mRNA expression was normalised to 18S. **c**, Representative images of RyR2 immunolabelling (green signal) in the sinus node of sedentary and trained rats (top) and mice (bottom). Scale bar, 10 μm. **d**, Mean (+SEM) RyR2 protein expression in rats (n=4/4) and mice (n=4/4). **e**, Mean (+SEM) change in the spontaneous rate of the isolated sinus node on disruption of the Ca<sup>2+</sup> clock by 2 μM ryanodine in rats (n=7/7) and mice (n=6/6). For **a** and **b**, statistical significance of differences between sedentary and trained animals was tested using the non-parametric limma test and Benjamini-Hochberg False Discovery Rate (FDR) (\*P<0.05; #P<0.2). For **d** and **e**, statistical significance was tested using Student's *t* test (\*P<0.05). Normal distribution of data was tested using the Shapiro-Wilk *W* test and equal variance was tested using the *F* test.

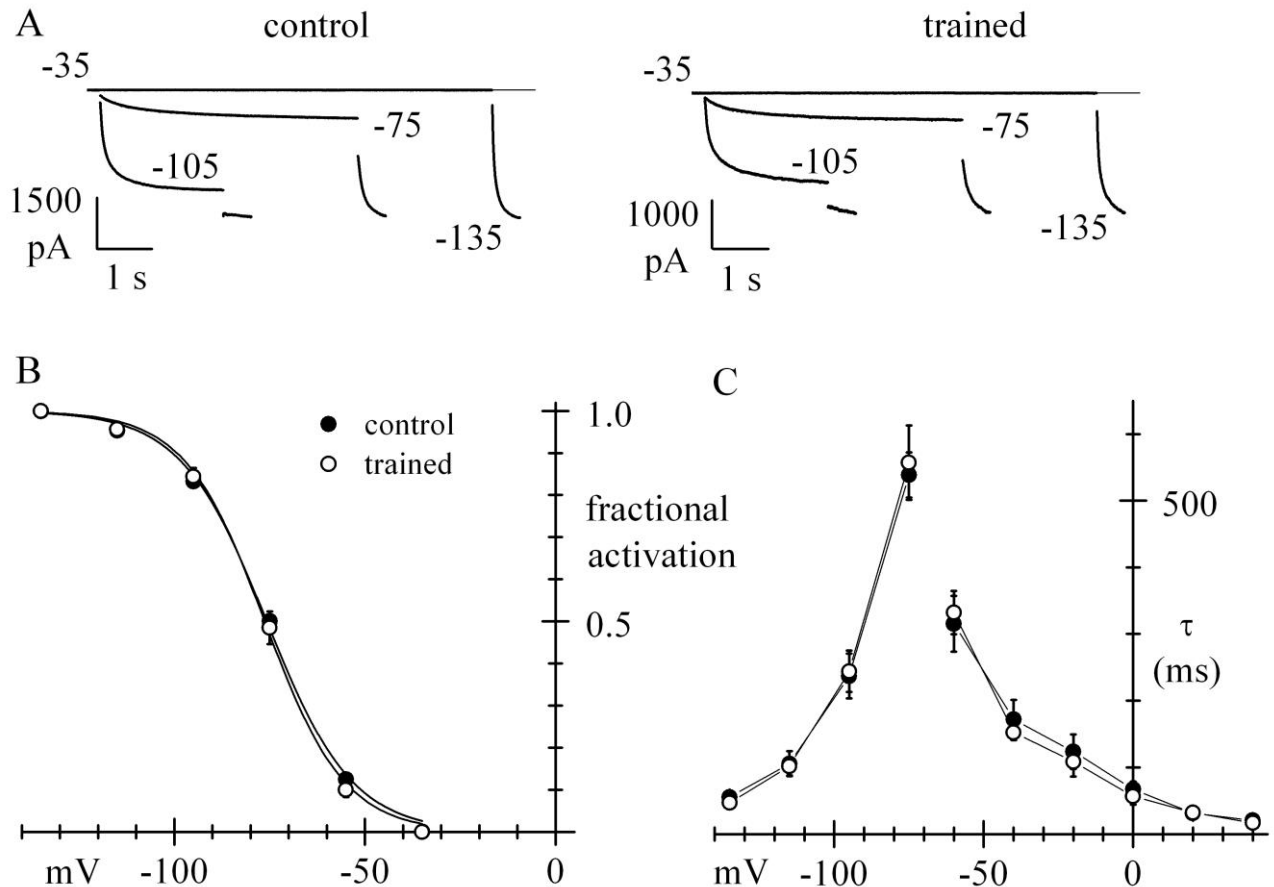

**Supplementary Figure 2.  $I_f$  kinetics are not modified by training.** **a**, Sample current traces recorded with a two-step protocol to measure the activation curve from single sinus node cells isolated from sedentary (left) and trained (right) mice. Only records at test voltages of -35, -75 and -105 mV are shown. **b**, Mean ( $\pm$ SEM) steady-state activation curves for sedentary ( $n=9/5$  cells/mice, filled circles) and trained ( $n=10/5$ , empty circles) mice. Data were fitted with the Boltzmann equation (solid lines); half-activation voltages and inverse-slope factors were: -75.8 and 11.2 mV for sedentary mice and -76.3 and 10.5 mV for trained mice. For both groups the individual activation curves were each fit to the Boltzmann equation, and the calculated midpoint ( $V_{1/2}$ ) and slope factor ( $s$ ) compared using the Student  $t$ -test. Mean values obtained were not significantly different ( $P>0.05$ ). **c**, Mean ( $\pm$ SEM) activation and deactivation time constant curves for sedentary and trained mice (symbols as in **b**). Data negative to -70 mV are activation time constants ( $n=8/5$  for sedentary and  $n=10/5$  for trained mice) and data positive to -70 mV are deactivation time constants ( $n=9/5$  for sedentary and  $n=8/5$  for trained mice). Curves through points. Activation/deactivation kinetics of training mice are not statistically different than those of control mice (Student  $t$ -test,  $P>0.05$ ).

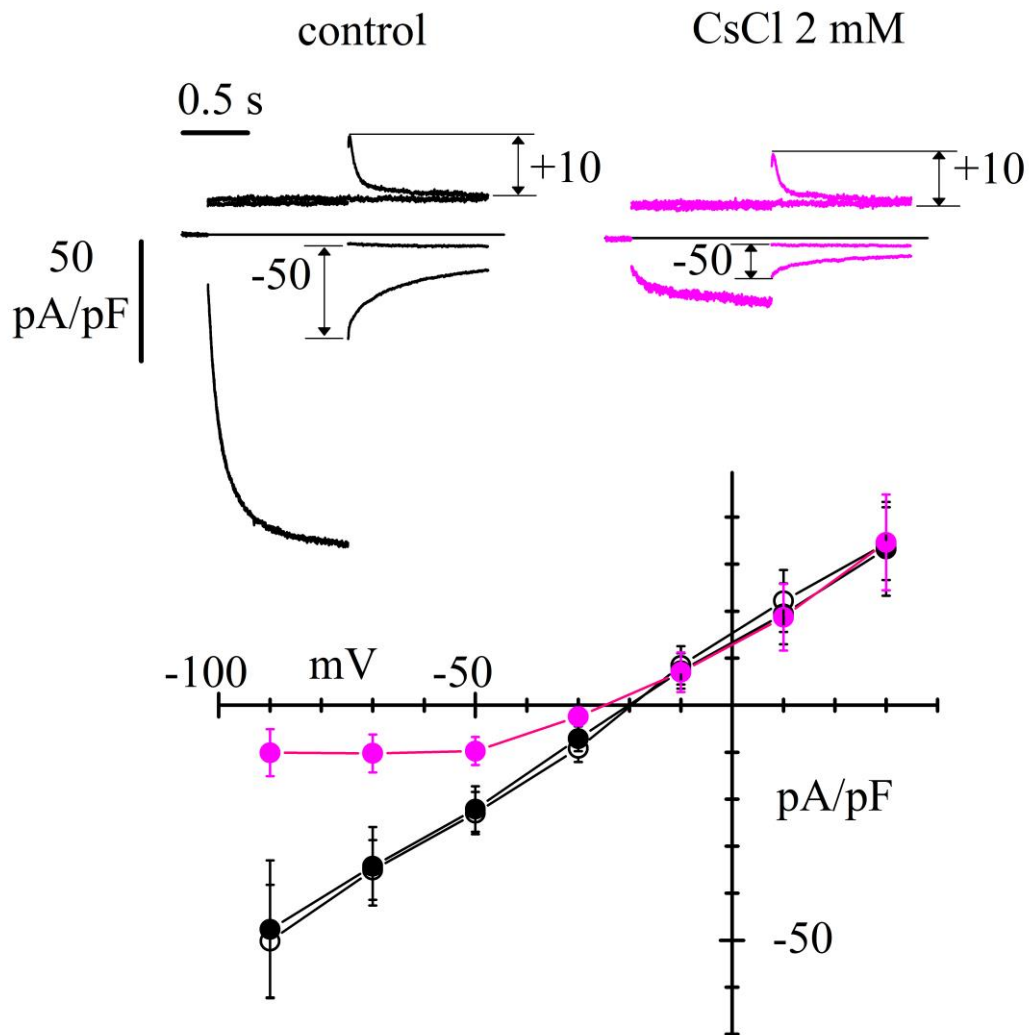

**Supplementary Figure 3. Action of 2 mM CsCl on  $I_t$  recorded from SAN cells isolated from sedentary mice.** Top, sample current traces recorded with the protocol used to measure the fully activated IV relationship in control solution (left) and in the presence of 2 mM CsCl (right). Conditioning activating/deactivating voltages were -125 and +10 mV, and pairs of steps to the same test voltage (range, -90 through +30 mV) were applied in sequence from these two levels. Records are shown for the test voltages of -50 and +10 mV. Bottom, mean ( $\pm$ SEM) fully-activated IV relationship in control (black circles,  $n=6$ ), after addition of 2 mM CsCl (magenta circles,  $n=6$ ) and after return to control (empty circles,  $n=5$ ) is shown. The voltage dependence of block is apparent from the outward-rectifying shape of the I-V curve in the presence of  $\text{Cs}^+$ . In the negative voltage region of the I-V curve, the block is characterised by an increased current block at more negative voltages. The blockade caused by 2 mM  $\text{Cs}^+$  was 78.8%, 70.0% and 55.8% at -90, -70 and -50 mV, respectively. Current amplitudes in the range -90 mV to -30 mV were significantly reduced by 2 mM CsCl ( $P<0.05$ , Paired Student's t-test).

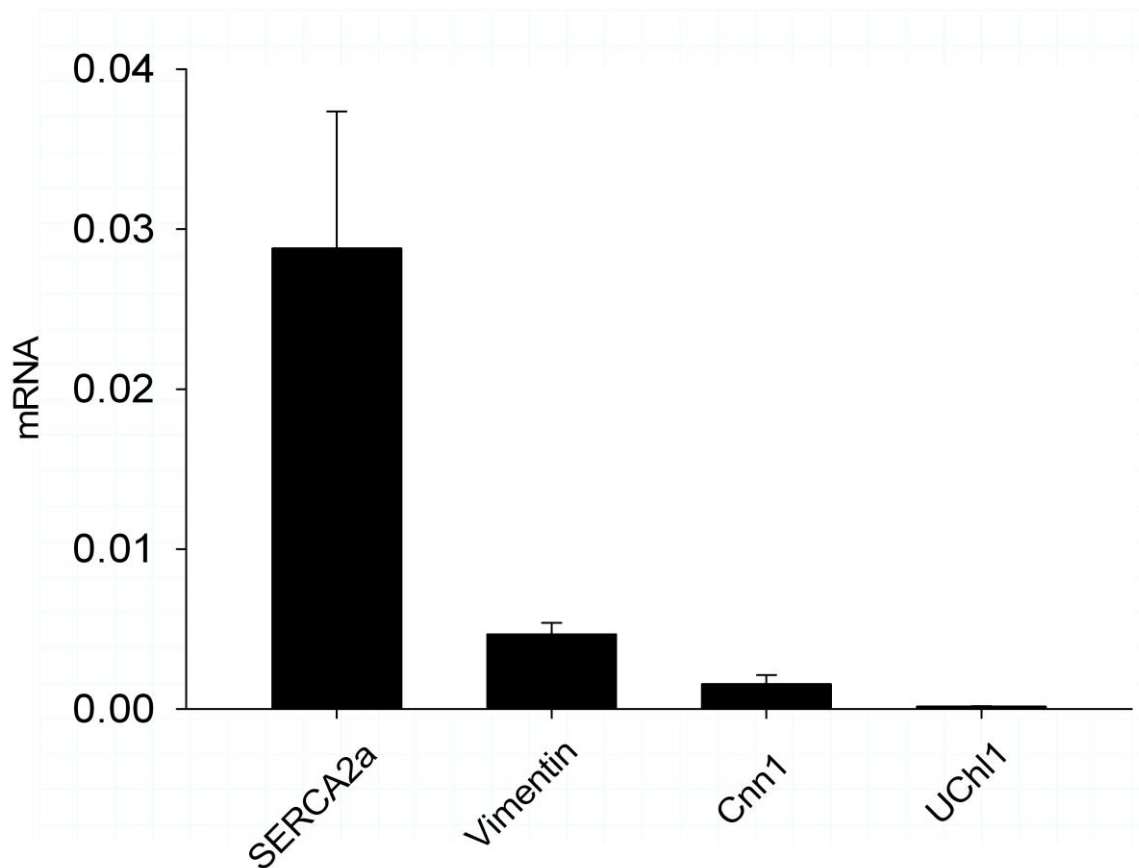

**Supplementary Figure 4. mRNA expression of cell type markers in mouse sinus node biopsies.** mRNA expression was normalised to expression of 18S mRNA. The expression of the cardiomyocyte marker, SERCA2a, was 6.2-fold higher than the expression of a fibroblast marker, vimentin; 18.5-fold higher than the expression of a vascular smooth muscle cell marker, Cnn1; and 189-fold higher than the expression of a neuronal marker, Uchl1. Means+SEM (n=5) shown.

**Supplementary Table 1 (part 1). mRNAs in the rat sinus node that changed significantly in response to training.**

| mRNA                                                    | Sedentary (mean±SEM) | Trained (mean±SEM) | FDR adjusted P value | Trained/sedentary (%) | n   | Applied Biosystems Assay ID |
|---------------------------------------------------------|----------------------|--------------------|----------------------|-----------------------|-----|-----------------------------|
| <b>HCN channels</b>                                     |                      |                    |                      |                       |     |                             |
| HCN1                                                    | 0.9 ± 0.2            | 0.3 ± 0.1          | 0.010                | 30%                   | 5/8 | Rn00670384_m1               |
| HCN4                                                    | 19.4 ± 3.5           | 6.3 ± 1.2          | 0.010                | 32%                   | 5/8 | Rn00572232_m1               |
| <b>Na<sup>+</sup> channels</b>                          |                      |                    |                      |                       |     |                             |
| Na <sub>v</sub> 1.5                                     | 124 ± 15.4           | 37.5 ± 9.4         | 0.013                | 30%                   | 5/8 | Rn00565502_m1               |
| Na <sub>v</sub> 2.1                                     | 20.9 ± 3.1           | 7.7 ± 2.2          | 0.010                | 37%                   | 5/8 | Rn00581647_m1               |
| <b>Ca<sup>2+</sup> channels</b>                         |                      |                    |                      |                       |     |                             |
| Ca <sub>v</sub> 1.2                                     | 14.4 ± 2.4           | 5.3 ± 1.3          | 0.016                | 36%                   | 5/8 | Rn00709287_m1               |
| Ca <sub>v</sub> 1.3                                     | 0.022 ± 0.012        | 0.004 ± 0.001      | 0.039                | 18%                   | 5/8 | Rn00568820_m1               |
| Ca <sub>v</sub> 3.1                                     | 34.0 ± 12.6          | 4.7 ± 1.1          | 0.007                | 14%                   | 5/8 | Rn00581051_m1               |
| Ca <sub>v</sub> 3.2                                     | 12.0 ± 4.9           | 1.2 ± 0.3          | 0.007                | 10%                   | 5/8 | Rn01460348_m1               |
| Ca <sub>v</sub> α2δ1                                    | 8.3 ± 2.2            | 2.9 ± 0.6          | 0.024                | 35%                   | 5/8 | Rn01442580_m1               |
| Ca <sub>v</sub> α2δ2                                    | 19.5 ± 7.1           | 2.6 ± 0.6          | 0.007                | 13%                   | 5/8 | Rn00457825_m1               |
| Ca <sub>v</sub> β2                                      | 9.4 ± 2.2            | 2.1 ± 0.5          | 0.007                | 22%                   | 5/8 | Rn00587789_m1               |
| <b>Transient outward K<sup>+</sup> channels</b>         |                      |                    |                      |                       |     |                             |
| K <sub>v</sub> 1.4                                      | 2.8 ± 0.8            | 1.4 ± 0.6          | 0.020                | 48%                   | 5/7 | Rn02532059_s1               |
| KChIP2                                                  | 42.0 ± 10.2          | 12.3 ± 2.8         | 0.019                | 29%                   | 5/8 | Rn01411451_m1               |
| <b>Delayed rectifier K<sup>+</sup> channels</b>         |                      |                    |                      |                       |     |                             |
| K <sub>v</sub> 1.2                                      | 7.3 ± 1.7            | 2.0 ± 0.8          | 0.013                | 28%                   | 5/7 | Rn02094595_s1               |
| ERG1                                                    | 6.9 ± 2.1            | 2.0 ± 0.4          | 0.020                | 28%                   | 5/8 | Rn00588515_m1               |
| <b>Inward rectifier K<sup>+</sup> channels</b>          |                      |                    |                      |                       |     |                             |
| K <sub>ir</sub> 2.1                                     | 16.4 ± 4.7           | 3.3 ± 0.7          | 0.010                | 20%                   | 5/8 | Rn00568808_s1               |
| K <sub>ir</sub> 2.2                                     | 17.6 ± 5.4           | 3.9 ± 1.0          | 0.010                | 22%                   | 5/8 | Rn02533449_s1               |
| K <sub>ir</sub> 3.1                                     | 89.4 ± 24.6          | 27.8 ± 7.1         | 0.023                | 31%                   | 5/8 | Rn00434617_m1               |
| K <sub>ir</sub> 3.4                                     | 47.3 ± 10.7          | 16.6 ± 3.4         | 0.022                | 35%                   | 5/8 | Rn01789221_mH               |
| K <sub>ir</sub> 6.1                                     | 6.9 ± 0.9            | 2.2 ± 0.6          | 0.010                | 32%                   | 5/8 | Rn01492857_m1               |
| K <sub>ir</sub> 6.2                                     | 29.0 ± 5.8           | 8.6 ± 1.8          | 0.010                | 29%                   | 5/8 | Rn01764077_s1               |
| SUR1                                                    | 16.5 ± 3.7           | 4.2 ± 0.9          | 0.019                | 25%                   | 5/8 | Rn00564778_m1               |
| SUR2                                                    | 40.0 ± 7.8           | 8.2 ± 1.7          | 0.007                | 20%                   | 5/8 | Rn00564842_m1               |
| <b>Miscellaneous K<sup>+</sup> channels</b>             |                      |                    |                      |                       |     |                             |
| SK1                                                     | 1.3 ± 0.7            | 0.5 ± 0.1          | 0.028                | 40%                   | 5/8 | Rn00570904_m1               |
| SK2                                                     | 0.3 ± 0.1            | 0.9 ± 0.5          | 0.010                | 258%                  | 5/8 | Rn00570910_m1               |
| TASK1                                                   | 79.9 ± 13.9          | 81.6 ± 12.8        | 0.027                | 102%                  | 5/8 | Rn00583727_m1               |
| TRPC1                                                   | 5.4 ± 1.4            | 1.2 ± 0.3          | 0.007                | 21%                   | 5/8 | Rn00585625_m1               |
| <b>Cl<sup>-</sup> channels</b>                          |                      |                    |                      |                       |     |                             |
| Chloride channel 2                                      | 1.7 ± 0.5            | 1.8 ± 0.3          | 0.013                | 107%                  | 5/8 | Rn00567553_m1               |
| Chloride channel 3                                      | 7.3 ± 1.6            | 16.0 ± 8.5         | 0.007                | 218%                  | 5/8 | Rn01535195_m1               |
| <b>Gap junction channel</b>                             |                      |                    |                      |                       |     |                             |
| Cx45                                                    | 8.7 ± 2.0            | 2.8 ± 0.8          | 0.011                | 32%                   | 5/8 | Rn01750705_m1               |
| <b>Na<sup>+</sup>-K<sup>+</sup> Pump</b>                |                      |                    |                      |                       |     |                             |
| Na <sup>+</sup> -K <sup>+</sup> pump α1 subunit         | 351.0 ± 87.2         | 97.9 ± 25.1        | 0.010                | 28%                   | 5/8 | Rn01533986_m1               |
| Na <sup>+</sup> -K <sup>+</sup> pump α2 subunit         | 35.2 ± 3.5           | 15.4 ± 4.5         | 0.031                | 44%                   | 5/8 | Rn00560789_m1               |
| Na <sup>+</sup> -K <sup>+</sup> pump β1 subunit         | 215.0 ± 41.8         | 63.4 ± 14.3        | 0.011                | 29%                   | 5/8 | Rn00565405_m1               |
| <b>Intracellular Ca<sup>2+</sup>-handling molecules</b> |                      |                    |                      |                       |     |                             |
| NCX1                                                    | 80.0 ± 12.7          | 21.9 ± 6.2         | 0.007                | 27%                   | 5/8 | Rn00570527_m1               |
| SERCA2a                                                 | 2240.0 ± 299.0       | 703.0 ± 180.0      | 0.012                | 31%                   | 5/8 | Rn00568762_m1               |
| Phospholamban                                           | 686.0 ± 240.0        | 169.0 ± 38.5       | 0.010                | 25%                   | 5/8 | Rn01434045_m1               |
| Calsequestrin 2                                         | 381.0 ± 56.6         | 127.0 ± 32.6       | 0.010                | 33%                   | 5/8 | Rn00567508_m1               |
| RYR2                                                    | 296.0 ± 49.6         | 90.1 ± 22.1        | 0.013                | 30%                   | 4/8 | Rn01470303_m1               |
| RYR3                                                    | 2.6 ± 0.4            | 1.0 ± 0.3          | 0.010                | 37%                   | 5/8 | Rn01328415_g1               |
| IP <sub>3</sub> receptor 1                              | 14.3 ± 2.9           | 5.0 ± 1.4          | 0.011                | 35%                   | 5/8 | Rn01425738_m1               |
| IP <sub>3</sub> receptor 2                              | 5.1 ± 0.9            | 2.0 ± 0.6          | 0.012                | 40%                   | 5/8 | Rn00579067_m1               |
| IP <sub>3</sub> receptor 3                              | 5.6 ± 1.2            | 1.5 ± 0.5          | 0.011                | 27%                   | 5/8 | Rn00565664_m1               |
| <b>Receptors</b>                                        |                      |                    |                      |                       |     |                             |
| α1A/1C adrenergic receptor                              | 7.4 ± 3.0            | 1.4 ± 0.3          | 0.012                | 19%                   | 5/8 | Rn00567876_m1               |
| α1B adrenergic receptor                                 | 8.5 ± 1.5            | 2.5 ± 0.4          | 0.013                | 29%                   | 5/8 | Rn01471343_m1               |
| β1 adrenergic receptor                                  | 44.3 ± 8.1           | 12.8 ± 2.6         | 0.013                | 29%                   | 5/8 | Rn00824536_s1               |
| β2 adrenergic receptor                                  | 5.8 ± 1.6            | 1.8 ± 0.5          | 0.017                | 30%                   | 5/7 | Rn00560650_s1               |
| M2 muscarinic receptor                                  | 41.6 ± 10.2          | 15.3 ± 5.1         | 0.013                | 37%                   | 5/8 | Rn02532311_s1               |
| <b>Extracellular matrix components</b>                  |                      |                    |                      |                       |     |                             |
| Collagen type 1 a                                       | 25.4 ± 5.2           | 9.0 ± 2.3          | 0.020                | 36%                   | 5/8 | Rn01463848_m1               |
| Collagen type 3 a                                       | 226.0 ± 29.4         | 68.5 ± 19.4        | 0.011                | 30%                   | 5/7 | Rn01437681_m1               |
| TGFβ3                                                   | 5.5 ± 1.1            | 1.8 ± 0.4          | 0.010                | 32%                   | 5/8 | Rn01475964_m1               |

mRNA expression ( $\times 10^6$ ) shown relative to that of the housekeeper gene, 18S.

**Supplementary Table 1 (part 2). mRNAs in the rat sinus node that changed significantly in response to training.**

| mRNA                                                        | Sedentary<br>(mean±SEM) | Trained<br>(mean±SEM) | FDR adjusted P<br>value | Trained/sedentary<br>(%) | n   | Applied<br>Biosystems<br>Assay ID |
|-------------------------------------------------------------|-------------------------|-----------------------|-------------------------|--------------------------|-----|-----------------------------------|
| <b>cAMP pathway</b>                                         |                         |                       |                         |                          |     |                                   |
| Adenylate cyclase 4                                         | 6.4 ± 1.3               | 2.0 ± 0.5             | 0.010                   | 31%                      | 5/8 | Rn00570644_m1                     |
| Adenylate cyclase 4                                         | 52.4 ± 12.2             | 13.0 ± 3.0            | 0.007                   | 25%                      | 5/8 | Rn00575059_m1                     |
| Protein kinase A catalytic<br>subunit α                     | 99.5 ± 28.0             | 30.8 ± 7.8            | 0.010                   | 31%                      | 5/8 | Rn01432302_m1                     |
| Protein kinase A catalytic<br>subunit β                     | 17.5 ± 3.9              | 4.7 ± 1.2             | 0.013                   | 27%                      | 5/8 | Rn01293014_m1                     |
| cAMP-dependent protein kinase<br>type I α regulatory chain  | 106.0 ± 25.9            | 31.2 ± 6.0            | 0.010                   | 29%                      | 5/8 | Rn00566036_m1                     |
| cAMP-dependent protein kinase<br>type 2 α regulatory chain  | 34.3 ± 9.6              | 8.2 ± 2.0             | 0.011                   | 24%                      | 5/8 | Rn00709403_m1                     |
| Ca <sup>2+</sup> /calmodulin-dependent<br>protein kinase II | 16.8 ± 2.9              | 4.0 ± 0.9             | 0.007                   | 24%                      | 5/8 | Rn00560913_m1                     |
| Phosphodiesterase 2a                                        | 9.9 ± 0.9               | 3.5 ± 0.8             | 0.010                   | 36%                      | 5/8 | Rn01648917_m1                     |
| Phosphodiesterase 4d                                        | 13.5 ± 3.1              | 2.8 ± 0.6             | 0.007                   | 21%                      | 5/8 | Rn00566798_m1                     |
| <b>Miscellaneous</b>                                        |                         |                       |                         |                          |     |                                   |
| Cardiac myosin heavy chain α6                               | 5420 ± 2500             | 1900 ± 1200           | 0.019                   | 35%                      | 5/8 | Rn00691721_g1                     |
| Atrial natriuretic peptide<br>precursor                     | 24300 ± 23400           | 2110 ± 1550           | 0.019                   | 9%                       | 5/7 | Rn00561661_m1                     |
| Tbx3                                                        | 8.9 ± 4.1               | 1.0 ± 0.3             | 0.010                   | 11%                      | 5/8 | Rn00710902_m1                     |

mRNA expression ( $\times 10^6$ ) shown relative to that of the housekeeper gene, 18S.

**Supplementary Table 2. mRNAs in the rat sinus node that were not significantly altered by training.**

| mRNA                                                     | Sedentary<br>(mean±SEM) | Trained<br>(mean±SEM) | FDR<br>Adjusted<br>P value | n   | Applied Biosystems<br>Assay ID |
|----------------------------------------------------------|-------------------------|-----------------------|----------------------------|-----|--------------------------------|
| <b>HCN channels</b>                                      |                         |                       |                            |     |                                |
| HCN2                                                     | 2.38±0.60               | 1.12±0.30             | 0.091                      | 5/8 | Rn01408575_gH                  |
| <b>Na<sup>+</sup> channels</b>                           |                         |                       |                            |     |                                |
| Na <sub>v</sub> 1.1                                      | 1.26±0.27               | 0.616±0.18            | 0.091                      | 5/8 | Rn00578439_m1                  |
| Na <sub>v</sub> β.1                                      | 56.3±6.65               | 33.3±10.4             | 0.105                      | 5/8 | Rn00581647_m1                  |
| <b>Transient outward K<sup>+</sup> channels</b>          |                         |                       |                            |     |                                |
| K <sub>v</sub> 1.5                                       | 6.51±2.34               | 1.66±0.40             | 0.105                      | 5/8 | Rn00564245_s1                  |
| K <sub>v</sub> 4.2                                       | 0.881±0.19              | 0.619±0.24            | 0.361                      | 5/8 | Rn00581941_m1                  |
| K <sub>v</sub> 4.3                                       | 0.596±0.19              | 0.0842±0.02           | 0.051                      | 5/8 | Rn00709609_m1                  |
| <b>Delayed rectifier K<sup>+</sup> channels</b>          |                         |                       |                            |     |                                |
| K <sub>v</sub> 2.1                                       | 13.2±2.01               | 8.17±2.16             | 0.105                      | 5/8 | Rn00755102_m1                  |
| <b>Inward rectifier K<sup>+</sup> channels</b>           |                         |                       |                            |     |                                |
| K <sub>ir</sub> 2.4                                      | 0.977±0.26              | 0.447±0.18            | 0.161                      | 5/8 | Rn00821873_m1                  |
| K <sub>v</sub> LQT1                                      | 15±2.98                 | 4.29±1.32             | 0.102                      | 5/8 | Rn00583376_m1                  |
| <b>Miscellaneous K<sup>+</sup> channels</b>              |                         |                       |                            |     |                                |
| SK3                                                      | 0.3±0.06                | 1.02±0.32             | 0.721                      | 5/8 | Rn00570912_m1                  |
| TWIK 1                                                   | 1.87±1.72               | 0.266±0.07            | 0.892                      | 5/8 | Rn00572452_m1                  |
| TRPC3                                                    | 1.04±0.23               | 0.417±0.14            | 0.082                      | 5/8 | Rn00572928_m1                  |
| TRPC6                                                    | 0.0983±0.05             | 0.18±0.09             | 0.166                      | 5/8 | Rn00677559_m1                  |
| <b>Gap junction channel</b>                              |                         |                       |                            |     |                                |
| Cx43                                                     | 309±169                 | 4040±3990             | 0.531                      | 5/8 | Rn01433957_m1                  |
| Cx40                                                     | 1.84±0.31               | 0.631±0.18            | 0.105                      | 5/8 | Rn00570632_m1                  |
| Cx30.2                                                   | 8.67±2.03               | 2.8±0.75              | 0.129                      | 5/8 | Rn01771737_s1                  |
| <b>Intracellular Ca<sup>2+</sup>-handling molecules</b>  |                         |                       |                            |     |                                |
| PMCA1                                                    | 0.303±0.21              | 2.36±1.59             | 0.127                      | 4/8 | Rn00584038_m1                  |
| <b>Receptors</b>                                         |                         |                       |                            |     |                                |
| Adenosine α1 receptor                                    | 7.38±2.96               | 1.4±0.34              | 0.139581                   | 5/8 | Rn00567668_m1                  |
| α1D adrenergic receptor                                  | 0.226±0.098             | 1.43±0.80             | 0.051                      | 5/8 | Rn00577931_m1                  |
| <b>cAMP pathway</b>                                      |                         |                       |                            |     |                                |
| cAMP-dependent protein kinase type 2β regulatory subunit | 2.15±0.50               | 5.34±3.09             | 0.355                      | 5/8 | Rn01748544_m1                  |
| Phosphodiesterase 1b                                     | 0.483±0.12              | 0.392±0.12            | 0.301                      | 5/8 | Rn00575591_m1                  |
| Phosphodiesterase 3b                                     | 1.66±0.42               | 2.5±1.1               | 0.516                      | 5/8 | Rn00568191_m1                  |
| <b>Miscellaneous</b>                                     |                         |                       |                            |     |                                |
| Brain natriuretic peptide precursor                      | 31.4±59                 | 8.84±8.88             | 0.504                      | 5/8 | Rn00676450_g1                  |

mRNA expression ( $\times 10^6$ ) shown relative to that of the housekeeper gene, 18S.

**Supplementary Table 3. Relationship between mRNA expression of key pacemaker components and  $\dot{V}O_{2,max}$  in rats (sedentary and trained).**

| Dependent variable (mRNA) | $R^2$       | $P$           |
|---------------------------|-------------|---------------|
| <b>HCN4</b>               | <b>0.69</b> | <b>0.0008</b> |
| <b>RyR2</b>               | <b>0.54</b> | <b>0.006</b>  |
| <b>NCX1</b>               | <b>0.40</b> | <b>0.06</b>   |
| <b>SERCA2a</b>            | <b>0.37</b> | <b>0.03</b>   |
| <b>Ca<sub>v</sub>1.2</b>  | <b>0.36</b> | <b>0.03</b>   |
| <b>Phospholamban</b>      | <b>0.34</b> | <b>0.04</b>   |
| Ca <sub>v</sub> 3.1       | 0.23        | 0.11          |
| Ca <sub>v</sub> 1.3       | 0.23        | 0.18          |
| PMCA1                     | 0.01        | 0.69          |

Coefficient of determination ( $R^2$ ) and  $P$  values were computed by fitting data with straight lines by linear regression. n=4-5/8 rats. Significant correlations are highlighted in bold. Data are ranked according to the  $R^2$  value.



**Supplementary Table 4. Relationship between mRNA expression of key pacemaker components and transcriptional regulators of HCN4 in rats (sedentary and trained).**

**Independent variable: Tbx3 mRNA**

| Dependent variable (mRNA) | R <sup>2</sup> | P            |
|---------------------------|----------------|--------------|
| <b>HCN4</b>               | <b>0.7</b>     | <b>0.007</b> |
| <b>RyR2</b>               | <b>0.54</b>    | <b>0.006</b> |
| <b>NCX1</b>               | <b>0.47</b>    | <b>0.03</b>  |
| <b>Phospholamban</b>      | <b>0.34</b>    | <b>0.04</b>  |
| SERCA2a                   | 0.27           | 0.07         |
| Ca <sub>v</sub> 1.3       | 0.13           | 0.32         |
| PMCA1                     | 0.11           | 0.27         |
| Ca <sub>v</sub> 3.1       | 0.11           | 0.28         |
| Ca <sub>v</sub> 1.2       | 0.1            | 0.3          |

**Independent variable: NRSF mRNA**

| Dependent variable (mRNA) | R <sup>2</sup> | P           |
|---------------------------|----------------|-------------|
| <b>HCN4</b>               | <b>0.37</b>    | <b>0.04</b> |
| NCX1                      | 0.09           | 0.42        |
| Phospholamban             | 0.08           | 0.42        |
| Ca <sub>v</sub> 3.1       | 0.08           | 0.44        |
| RyR2                      | 0.07           | 0.44        |
| PMCA1                     | 0.06           | 0.48        |
| Ca <sub>v</sub> 1.3       | 0.04           | 0.65        |
| Ca <sub>v</sub> 1.2       | 0.02           | 0.65        |
| SERCA2a                   | 0.01           | 0.73        |

**Independent variable: miR-1**

| Dependent variable (mRNA) | R <sup>2</sup> | P           |
|---------------------------|----------------|-------------|
| <b>HCN4</b>               | <b>0.36</b>    | <b>0.04</b> |
| RyR2                      | 0.19           | 0.17        |
| NCX1                      | 0.13           | 0.36        |
| Phospholamban             | 0.16           | 0.21        |
| SERCA2a                   | 0.93           | 0.001       |
| Ca <sub>v</sub> 1.2       | 0.03           | 0.61        |
| PMCA1                     | 0.01           | 0.37        |
| Ca <sub>v</sub> 3.1       | 0.06           | 0.5         |
| Ca <sub>v</sub> 1.3       | 0.0004         | 0.95        |

Coefficient of determination (R<sup>2</sup>) and P values were computed by fitting data with straight lines by linear regression. n=4-5/8 rats. Significant correlations are highlighted in bold. Data are ranked according to the R<sup>2</sup> value.
